# Supplementary material for: Whole blood methylome-derived features to discriminate endocrine hypertension
Source: Clin Epigenetics. 2022 Nov 3;14:142. doi: 10.1186/s13148-022-01347-y (PMC9635165; doi:10.1186/s13148-022-01347-y)
Supplement: Supplementary file 6 — Additional file 6: Table S6. Methylome-based estimation of blood cell composition. [file 13148_2022_1347_MOESM6_ESM.xlsx]

## Sheet: Supplementary_Table6
Sample	CD8T	CD4T	NK	Bcell	Monocytes	Neutrophils
S1	0.134463072193386	0.18129616943001	1.73472347597681e-18	0.0774219596585122	0.0409646947888335	0.558938414219257
S2	0.195927021150792	0.151468398313346	0.0396415097737483	0.0757978649192073	0.0440981403243251	0.481884169942226
S3	0.0821641480783117	0.165860032542726	0	0.0652318691399622	0.073948091883511	0.591473982490684
S4	0.102942355768422	0.101384017851449	0.017399459004545	0.0656629422358165	0.0754639246707954	0.625458271803532
S5	0.137096234125969	0.132511356104614	0.0336721251875894	0.0669384345399228	0.0499152454459372	0.568791630793462
S6	0.0838576229112803	0.0809551316645345	0.0199545109133864	0.038778047730937	0.105950894608958	0.652382804227918
S7	0.106543121170091	0.217234879014721	0	0.0741795944982582	0.0415695725677502	0.556525980158872
S8	0.146024812790111	0.145960615216393	0.0401519135719848	0.0911325917812916	0.086911806937277	0.489818259702943
S9	0.073150951294082	0.100834748606642	0.0402898122823291	0.04513684563842	0.0690356207862119	0.653970885182032
S10	0.132783233645387	0.126470706448913	0.0891875434267681	0.0776240160595742	0.0902655639383012	0.483668936481057
S11	0.0666190188279125	0.0730223584603213	0.0431462840092792	0.0438363654913112	0.0635827474587481	0.699823436015924
S12	0.116276464149209	0	0.0651263777822239	0.0193875197751203	0.0489724138769409	0.745015861128975
S13	0.120867057130453	0.105422916143137	0	0.0922492111281085	0.064912148068738	0.608282617353094
S14	0.102493673515495	0.0536002836165129	0.00679130130529224	0.0417397081012262	0.0562452528914348	0.728684402195609
S15	0.131132798658072	0.176611918835277	0.0471304918698352	0.100089274385787	0.0524090620379132	0.484035808529965
S16	0.138709889054711	0.119470815561237	0.00616757453856351	0.0511032330206255	0.0629955188455223	0.606587328266945
S17	0.102098597631292	0.0557056830631702	0	0.0351350693612357	0.048392939536377	0.750065507054005
S18	0.152320601558667	0.0347987720160706	0.079609021799922	0.0620009273260569	0.0616226397526616	0.609648037546622
S19	0.126751531476303	0.0507769106456317	0.0496340255657551	0.0339122542402209	0.0845311657055778	0.654394112366512
S20	0.0969046212806875	0.197163701682926	0.0453518224844152	0.0434478096276267	0.0740916228440985	0.52720869865452
S21	0.165224077555874	0.034838440279244	0.0459632053380158	0.0497152244389706	0.0582586474096046	0.633110795097886
S22	0.189637260241386	0.105546514524984	0.00942956794555013	0.0550575672819758	0.0480484951998301	0.579287007283809
S23	0.104033396624814	0.0978587312010379	0.0749453188215748	0.0425074284044877	0.0651199800523192	0.604202210289452
S24	0.14024339096329	0.101358071754986	0.0163045167862699	0.0591011297329365	0.0627812190917223	0.610257593011536
S25	0.129663658917039	0.11245908892815	0.00252262267332371	0.0341341644465694	0.0786689249501494	0.632726558867496
S26	0.0629491647894063	0.111047850750274	0	0.058430899261642	0.0730168329377051	0.690629776666604
S27	0.0993990828864594	0.111347907054329	-2.28436732750648e-19	0.0938649740548041	0.0631396541917118	0.632248381812695
S28	0.165007288282594	0.147564372037423	0.0646490923033906	0.0616649390855924	0.0492826719732646	0.507947938705406
S29	0.120885648038931	0.0960379105451718	0.0210259325207577	0.0591737326334701	0.0693432946201614	0.627378937691732
S30	0.098307416932637	0.0665036644669165	0.0328164817526238	0.0509911845620209	0.074586966017338	0.676794286268464
S31	0.144760050759213	0.181833800665133	-1.51983382714083e-18	0.122864377901881	0.0502099022077013	0.500331868466071
S32	0.128873407922622	0.213485979686268	0	0.0971285650523432	0.0473349735289071	0.504003636909424
S33	0.118629955561378	0.0434228677476561	0.0565608229973679	0.0459231697548467	0.0841338941536799	0.651329289785071
S34	0.201564370859988	0.0304504450218777	0.0789318644536107	0.036442733700398	0.0666348022169724	0.574406004362348
S35	0.172420975606992	0.220057165615098	0.0105717491042588	0.0792433398311199	0.0472114975325526	0.458838176397799
S36	0.0709425937385946	0.0559262756358074	0.106627889489822	0.0633789346459117	0.0560753206473673	0.640207797589566
S37	0.122696483500208	0.122460433641273	0.0786155245008406	0.0621427588099778	0.044892033053457	0.569192766494243
S38	0.135081510599375	0.307527475947472	0	0.109742428461202	0.0306020894347832	0.394039232966896
S39	0.0776253770181444	0.161736881662123	0	0.0377044445783701	0.065037736053274	0.63769414227105
S40	0.0866459571915304	0.113574385682948	0	0.0545532106269254	0.0597602819419227	0.665099069085653
S41	0.0590827486035687	0.120780363035163	0.000677919857843948	0.0349212094808518	0.0541639892367666	0.709649049238888
S42	0.11699179960223	0.164750276114176	0.000202777886280581	0.101535234897036	0.0545034159238985	0.538518169428179
S43	0.0555812037938856	0.178129221642845	0.0654244071620374	0.0794985984605774	0.0744806588583452	0.537539203199718
S44	0.0627440476172443	0.0945699674587622	0.00600618471875114	0.0194816496295173	0.103805516504537	0.694447023631598
S45	0.0870181411022995	0.145898999488614	0	0.0323980746452584	0.0782568409206081	0.642809014254438
S46	0.128476456497592	0.254338861939904	0.0277848713665507	0.0412442502222952	0.0511746798240116	0.472405395964915
S47	0.0733095789023861	0.0889116676579901	0	0.045208565856379	0.0540090502047341	0.723809527107291
S48	0.129896560697325	0.113429267248765	0.0373237576609683	0.0724310403811619	0.0801932465054498	0.557588242936628
S49	0.105067830561183	0.180113630125996	0	0.0725343698253222	0.0642642657080116	0.572566473277634
S50	0.122705214721772	0.0768298570715106	0	0.0232377819084338	0.0757791331170318	0.678612705631784
S51	0.0966924970423141	0.0883173700083789	0	0.013403012252208	0.0729752615819091	0.712223975553478
S52	0.0752361867092357	0.115826758957998	0.0176575279935324	0.0567967973549424	0.0965255873793491	0.613491040421766
S53	0.0308643164191236	0	0.0310149967076049	0.0365711331259672	0.0280414685463655	0.856641458975935
S54	0.129578339702727	0.0363090856995055	0.0600856288735681	0.0617499388609973	0.0930422788625481	0.602926485885317
S55	0.12720305571085	0.204820317118192	0.024589440364961	0.0651492930849976	0.0380928575146501	0.540145036206349
S56	0.149860248957661	0	0.0231553064670548	0.0371223053696193	0.0624310555312565	0.715246936616428
S57	0.0635822457811949	0.0812020492787071	0.0436313365851276	0.0640520020863659	0.0431882848148991	0.690434488981002
S58	0.0943640635452043	0.112828538590666	0.0152201562263624	0.0251166053516653	0.0822166837284786	0.642928187602581
S59	0.0769075855626345	0.0682454748766514	0.126995854676862	0.0566015695278305	0.0909824461267629	0.571371841402247
S60	0.148813265369368	0.145943635381637	0.0363984826328559	0.0668691664934979	0.0541079108553277	0.538885130501779
S61	0.0519073355523045	0.0806527503530742	0.0384192530541907	0.0628106732575867	0.0581004973736734	0.70810949040917
S62	0.0541529496386705	0.0307475498649609	0	0.0490055260147397	0.0690521354384475	0.792905382169633
S63	0.127969843339211	0.0806193550854811	0.0409997056978424	0.0577838591172405	0.0939511835310995	0.598676053229125
S64	0.142978428057037	0.118124503556256	0.0607596370374507	0.076239796580618	0.0567963813319866	0.545101253436652
S65	0.0706208755382713	0.0461756110542526	0.0268691901262161	0.0382765420723936	0.0687568978561427	0.746390678246246
S66	0.0798783231845991	0.0999612812807803	-2.26996687016104e-19	0.0637689254334836	0.10643477407369	0.649956696027447
S67	0.185913238225635	0.108927130722269	0.0681212431464241	0.090451623419387	0.0442765102332238	0.498211448132226
S68	0.0741839932378807	0.0225077111650966	0.0480161551136751	0.0665711998833987	0.104295348472951	0.684425592126998
S69	0.100146935097679	0.0671632511002894	0	0.0333735334519701	0.10523946555937	0.684275258439819
S70	0.118944433754946	0.155021837886104	0.0539496259105566	0.0418799763196151	0.0611769504848751	0.559569958326442
S71	0.161080776749653	0.108416468870083	0.0297509826356585	0.0641931494819165	0.0510960664571783	0.579153370671406
S72	0.0861003684650436	0.0765986571000167	0.132917517692591	0.0743375201828042	0.0440326284901864	0.586013308069358
S73	0.0791389867657197	0.234336977093476	0.0174923663323439	0.0598165649341789	0.0610105076179327	0.529835695771737
S74	0.0827190967334935	0.108508795058493	0	0.0587289869784665	0.0188830332678074	0.711702282370697
S75	0.156637871863975	0.0290775535905017	0.102192237675748	0.0483869342850645	0.0575970304207684	0.588574862356462
S76	0.0938396027965717	0.0828431041950349	0.120824862425888	0.0456242973724454	0.0502869550554888	0.588369174600614
S77	0.0415735284247639	0.130293294817822	0	0.030646337570283	0.0881750376502111	0.678432624886628
S78	0.117853939197958	0.122502780452208	0	0.0308530376792869	0.0691523877815358	0.647256818676243
S79	0.0746249741238299	0.156773105883597	0.0244584494574115	0.0375221442842205	0.082141745359568	0.591736244458774
S80	0.163892499299098	0.0831802534833866	0	0.0926898971679564	0.0709272935679755	0.570199514628707
S81	0.107593857114309	0.109591623896272	0.0129646530247745	0.0839225706007775	0.0759783432999918	0.599716978627517
S82	0.0395982666478493	0.141400085182735	0.0108865383627926	0.0198792812329777	0.046561204007938	0.70939175249267
S83	0.0588050808468818	0.020784101608551	0	0.0272261090197495	0.108583819144869	0.763442518502661
S84	0.185194744316527	0.186117177526236	0	0.0286865477376004	0.0883303317228187	0.484405538993917
S85	0.141918466670456	0.171378369942318	0.010954402330237	0.0626481391385246	0.085063423321904	0.50893972171242
S86	0.0515493071239491	0.0824212408008094	3.46944695195361e-18	0.0248635624174682	0.0734092429502934	0.742968903877656
S87	0.103965704394816	0.167396268374004	0.135107428814027	0.0537449542235212	0.0532418843042805	0.486543759889351
S88	0.10158322036325	0.115264315172905	0.0645454303479336	0.0584512998034634	0.175277564467775	0.465532010576611
S89	0.115878125947559	0.0969189821773712	0.0242105695958287	0.0620888091324613	0.0749395584353378	0.607163206424713
S90	0.131192380308175	0.122810675439266	0.0624944489036992	0.0522372166276586	0.0955360296682218	0.517593856028406
S91	0.0995485322514343	0.100751634809552	0.0742588796783726	0.0510656207204166	0.0871125434970562	0.562413760570414
S92	0.0384541047219248	0.0521415515866884	0.0454901375829699	0.0591712989131367	0.105963337179603	0.679735458746476
S93	0.110712846322883	0.28063219772103	0.00954918035031668	0.0541582836560334	0.026276350452674	0.508657445166479
S94	0.104981823306702	0.129154229771065	0.0827173519164683	0.069895215299317	0.076805669265909	0.518321090116067
S95	0.0907310983856514	0.179675121763393	0	0.0561832910506227	0.0602966954569673	0.59225801293556
S96	0.162048850255576	0.0829479459323574	0	0.0711138743687366	0.119308813632205	0.55781200356659
S97	0.121651622499648	0.093418300574334	0.0677208716434339	0.0531356360418131	0.0886505524042574	0.549248124577847
S98	0.122113054828065	0.101379032249969	0	0.0459212489401498	0.0886055581758833	0.625705835780919
S99	0.111582249390349	0.0571185991393778	0	0.0591978939013994	0.0911023918610244	0.68099886570785
S100	0.0817242623951213	0.0515651367030525	0.0513880818248628	0.0261291865826894	0.0835044801272253	0.69668449511396
S101	0.0986204433306878	0.102063815772819	0.0204384941883754	0.0585366396635862	0.0947517744192883	0.625298887108246
S102	0.117224749196808	0.122810957307774	0.021045922026934	0.0712823475303524	0.102573085162829	0.559508705937416
S103	0.121893575417437	0.0179215346081188	0.0550806665523214	0.0481706511424746	0.0825111817613209	0.674422390518328
S104	0.13443904414747	0.166458165754368	0	0.046721209798491	0.0769097548063503	0.558831926180115
S105	0.151330367722769	0.185771916541372	0.130356378482905	0.0598221592909942	0.043207540416854	0.410494883328644
S106	0.0980654874766757	0.0480755638948792	0.0232910693103995	0.0465503712594871	0.0735822450324223	0.698997169260674
S107	0.0728429950483982	0.0847716202392634	0	0.0632477587602563	0.0919667993861683	0.666418265570334
S108	0.0859348133204614	0.178321198327292	0.0229507661918202	0.0216295194552974	0.0577303393225448	0.626982893932134
S109	0.108028584650051	0.106468945499479	0	0.0935806886513343	0.127279520338028	0.55332707191841
S110	0.102229176859019	0.129673229939113	0.0421037899730246	0.138684763009435	0.0516455676033334	0.526662259652218
S111	0.132021689806262	0.133921439301794	0.0606774736564216	0.0431778920129575	0.135732478518481	0.48050240024459
S112	0.146494401508105	0.0915796577864089	0.00928849090124304	0.0454039426048824	0.0601929729065743	0.6243408088106
S113	0.148325338734638	0.0629992772969997	0.0782457912374332	0.0337009403074937	0.070427073586981	0.596563218538334
S114	0.119849276164916	0.151577259027329	0.0244777401153726	0.0828726927263673	0.0787234980809765	0.531026470215696
S115	0.0860116692139978	0.194488912159981	0.0177116345028245	0.0494718044405478	0.0132911784474506	0.624402692444245
S116	0.122050902663492	0.0851906380804258	0.00333126969461138	0.0639769202567439	0.117349102196945	0.607700159393916
S117	0.113747438216248	0.0966749818628594	0.013608299925972	0.0408196803273808	0.111486483468732	0.616262867272909
S118	0.0876517765056535	0.171535039450275	0	0.0492141230707548	0.100425529202169	0.584984755195597
S119	0.0616752388578633	0.236033415446874	0	0.0466734936866131	0.112473889579493	0.535561899607773
S120	0.0658870622215092	0.0323439621830685	4.33680868994202e-19	0.0499630053050345	0.0503917215204473	0.790220414151647
S121	0.0505019750703847	-5.32015481942872e-20	0.0298221795839164	0.032895536500516	0.0718665107644618	0.814913798080721
S122	0.0971709234460178	0.0632178676403035	0.0100495242440969	0.0637393604475245	0.0964877942260194	0.66666611777646
S123	0.102409683720212	0.129446094207375	0.0540475996093028	0.246456262179897	0.0347142770941318	0.432926083189081
S124	0.156620398578637	0.207590293794312	0.00246225541725372	0.0506678256604697	0.0637301241537935	0.501357003724257
S125	0.127593651009803	0.231976382442393	-1.73472347597681e-18	0.0650466295716625	0.0218780968653383	0.538579797516226
S126	0.0483226923371071	0.0356572388159288	0.0287523369974282	0.0531099414308481	0.109546689767932	0.713808578295749
S127	0.113174442061435	0.032996943539867	0.151004442970924	0.0257776503757978	0.0507532953128438	0.608985074016253
S128	0.0899265257760115	0.0750643594835015	-5.64786997489734e-19	0.0549586232258282	0.0564573106582697	0.723593180856389
S129	0.106542621047356	0.0775181654462987	0.0344698329439	0.033533451493827	0.0537797827981331	0.685508412858876
S130	0.123667285232343	0.111719682850233	0.0128263655806303	0.0760082564070729	0.117629797281612	0.558148612648109
S131	0.0692523429084852	0.047966975258402	0.0829477157323106	0.0716958842687948	0.0787591695119625	0.648579545296031
S132	0.0688424242238798	0.0631320042829416	0.0180476009936512	0.0639460693773297	0.0400006319747328	0.746031269147465
S133	0.120988689059795	0.133590095595189	-7.34532023135942e-19	0.062583024135849	0.0823301445890907	0.600508046620076
S134	0.0830265874255383	0.201530176905617	0.0820584624431513	0.0627217686135928	0.0610130761324548	0.487939532917571
S135	0.0993812219992423	0.106461687970769	0	0.04806406751851	0.0554735181941615	0.672959000576217
S136	0.0755433762768917	0.043851015265884	0.0276925587404723	0.0634652451761013	0.0858524934411167	0.702636136591523
S137	0.136064163512093	0.0583355601907007	0.00589210955352568	0.0737686961362103	0.104855551342563	0.620667691038494
S138	0.142107753062292	0.183006365715356	0.184703993209668	0.0717006506218517	0.0752405492385279	0.332859563969708
S139	0.125074801525334	0.185863634144758	0.0353948631146179	0.050421156424622	0.0669092600165131	0.529412738810388
S140	0.156692099790551	0.147295160712523	-2.15762418048939e-19	0.0561364717775106	0.05849740207837	0.581378865641046
S141	0.118349615759684	0.0909525856079266	0.0352129143903453	0.0545342130022491	0.087075557517331	0.613875113722464
S142	0.0979893575315953	0.100274193248079	0.0202975406339298	0.0697353850944521	0.0508687055949036	0.66083481789704
S143	0.10897721206721	0.0828804451270834	0.125947141190005	0.0486286051308323	0.056428659372776	0.577137937112093
S144	0.126665418906835	0.0875224946172281	-1.25717746334457e-18	0.0875153799337942	0.055589933044634	0.642706773497509
S145	0.189496443219682	0.101947630381261	0	0.033821447135411	0.0792947556177268	0.593994213989463
S146	0.145225801831077	0.0729150857755454	0.00755409137247152	0.0362946603125909	0.0628560392381754	0.663739831718774
S147	0.106948853359463	0.11675097489066	0.0471568491984658	0.0795081268528191	0.0638935777513828	0.585741617947209
S148	0.0902077318795671	0.119459875321205	0	0.0584826240435542	0.0889313421094854	0.629687514242445
S149	0.0804083610849726	0.0534793972163631	0.00126778573607567	0.0412831425693383	0.074330018396312	0.749231294996938
S150	0.0780708716366798	0.0026799775848191	0.0124243504517055	0.0419671626287588	0.0307999308526726	0.833558375837474
S151	0.150567143797607	0.123400887060284	0.063902308841818	0.076401733112354	0.0900665474891744	0.495661379698762
S152	0.117369513556699	0.0377314286576705	0.0727803757135349	0.0419105437341181	0.111475219389767	0.616751183404045
S153	0.0932711505965324	0.0518534284483532	0.0355443752143012	0.0351697607279259	0.0406955082796487	0.736495557461322
S154	0.133360356421717	0.1123158252266	0.0291163162978228	0.040338786542951	0.074403501580329	0.603937621177049
S155	0.0849922683212786	0.149358965892673	0.0675162675660119	0.0608512333912401	0.0817255934034239	0.546086657513543
S156	0.0229828787681296	-1.36563673551067e-19	0.0313851914963518	0.0402279635383554	0.0760737612277733	0.82933020496939
S157	0.125556684804034	0.168550812596664	0.0880461601712132	0.103909034776026	0.0531128721822917	0.458506594286511
S158	0.0911190437864502	0.114309106871007	0.0261323660497428	0.0759141061980856	0.101809767324765	0.583673426361067
S159	0.135560686789201	0.154923178320487	0.102651073491526	0.0778650018432161	0.0553975886255868	0.473602470929983
S160	0.0958572595548033	0.204554924908849	0	0.055677376550232	0.0587671835274753	0.574633552797987
S161	0.0783020907901033	0.133901974203323	0	0.0607223352707782	0.0425658896586413	0.668236930422282
S162	0.0888922821478082	0.070373804923588	0.0145339824199091	0.102813147610566	0.0813213807135182	0.642065402184611
S163	0.0870703161054638	0.188182022469939	0	0.0609296544832191	0.0576877776294464	0.603577180057566
S164	0.128390229997377	0.18836239887694	0.018502637953905	0.0623832725198636	0.0655988515715348	0.527396234779871
S165	0.159791913859785	0.116483774146804	0.018988596734732	0.0571573664065783	0.0435842090507968	0.59002259894171
S166	0.155956771248182	0.108194654834547	0.0837595417270948	0.077928678292136	0.0686946549436671	0.503516531307395
S167	0.201812130335039	0.136710583450492	0.0197444047876897	0.103267283093834	0.101126944395215	0.427051671489998
S168	0.140616443041683	0.085462416989897	0.014416920965154	0.0553344367170787	0.0790227413712128	0.615948417733568
S169	0.107037763544831	0.121497105829865	0.00955322681661479	0.0843879785817096	0.0869282614244833	0.587524693228303
S170	0.140809248891475	0.0835005135833437	0.119870437556318	0.0385508368148801	0.0450527735379331	0.57221618961605
S171	0.123984504242955	0.184881573596245	0.0444427731664752	0.0741727260662917	0.0362233638907678	0.533970186946438
S172	0.068758757674656	0.0767841094641081	0.0699959141947759	0.0530555972902341	0.0603880156276042	0.671017605748622
S173	0.11608297316642	0.149424469004856	0.17831096558635	0.118134984415297	0.121270411493011	0.316776196334066
S174	0.163812613347464	0.163170481580768	-6.44235212458378e-19	0.0715005429791732	0.0362539941373989	0.565262367955196
S175	0.0297310798989796	0	0.038994104791787	0.0252466325414347	0.0176086680001778	0.874861720078962
S176	0.133291001597792	0.142345159924272	0	0.074149041801589	0.0508137572337807	0.595885689466131
S177	0.121192339412437	0.229929029423869	0.00937311368435366	0.0933506032090469	0.0404266804491774	0.505728233821116
S178	0.185415102657532	0.156228566444808	0.0215378038337241	0.1185598515945	0.0647569318598859	0.452965295162927
S179	0.083534810483508	0.0636207029753246	0.00748831076037164	0.0405216128118081	0.0789286972086719	0.716072732960617
S180	0.1612069223815	0.091121751342013	0.0354798382120203	0.0589385950183856	0.0970819608560134	0.556170932190068
S181	0.142568978309464	0.114541382427952	0.0470146700262029	0.153046694456518	0.00615495606754633	0.536673318712317
S182	0.0376999430794716	0	0.027281586947657	0.0478261957536773	0.0145094188057513	0.85893867130435
S183	0.112936662377538	0.120519886154301	0.0153685789761587	0.0473471239056358	0.0591209682595601	0.637739930148308
S184	0.168213090109983	0.137446897115866	0.11214668563049	0.0579296059289207	0.0255167785476035	0.498746942667137
S185	0.0906254604710314	0.0256844814416696	0.00884546156319606	0.0347506615794968	0.0368621769142865	0.785400601851338
S186	0.102556272762281	0.114073985637265	-6.93889390390723e-18	0.101119237720438	0.0712079106779867	0.598165323817903
S187	0.128591031437497	0.0469837560776584	0.0328098283820584	0.0427037810321325	0.0822897092502435	0.650936048227488
S188	0.0998291521765782	0.149868265851193	0	0.0538209702931098	0.0461872151494442	0.635077670504933
S189	0.121310578408595	0.0986115581117632	0.0233957953599283	0.0826824851122823	0.0594318611629114	0.597063770041509
S190	0.123274441150073	0.0696773403758571	0.125856230064452	0.0456919022303616	0.0656647196221404	0.562710396259492
S191	0.0949123954235831	0.242274285817277	0	0.0622661454194836	0.0356224722165606	0.548440608601402
S192	0.162978072229944	0.103286615285294	0.125359017485401	0.0779413700827193	0.0963148808890754	0.434120044027567
S193	0.151694134573916	0.056647177695648	0.0366153374982998	0.0622861619970538	0.0966578138794464	0.596099374355636
S194	0.115431256009867	0.0380057003178822	0.0342732713602538	0.0516261935833845	0.113493396230318	0.631883906831788
S195	0.145054263526663	0.132162025935747	0.0308496168719841	0.0870865307424922	0.0731722910877974	0.527702549412801
S196	0	-1.22741717004993e-19	0.11699739305555	0.0135402920211325	0.0143155946839981	0.832627651856159
S197	0.0528894830934356	0.0142269857332149	0.0333732533074998	0.0291626142767442	0.0244607399657475	0.823313759915523
S198	0.173495304092008	0.0956272470159231	0.100579662014813	0.078684159516834	0.0670542595164681	0.473081986444756
S199	0.102600856587396	0.0708686922978048	0.0124680892748685	0.0586798658923177	0.110915936220942	0.639475501314508
S200	0.088348407081517	0.222470455577046	0	0.0408981205504238	0.0810094657634128	0.549799346302756
S201	0.102646626706885	0.124569101920648	0	0.051402366561665	0.0973141404643893	0.618674217338065
S202	0.0887476694044436	0.0889883218083005	0.0214996930467169	0.0525128150828669	0.0596395999491015	0.682914464872334
S203	0.119787789632497	0.135316633093887	0.0392250578134266	0.0723987929095652	0.0569119381753468	0.575566038189743
S204	0.0718111628499121	0.205131002714312	0	0.122034436359395	0.0389553916312125	0.558465522195523
S205	0.119423577270113	0.0860770514508916	0.0360543524754989	0.0594280523627202	0.0624023222550555	0.629745976364542
S206	0.118014519710598	0.0716345486212794	0.00832934336156131	0.0496629816186418	0.101421215352086	0.634831199679758
S207	0.133210453674516	0.144278718248504	0.00959544304400043	0.078493226126604	0.0830950312712498	0.547521191664656
S208	0.128303529300296	0.149860788872181	0.0173787674144742	0.0882144104150268	0.0821987985207168	0.52708233409365
S209	0.00953491294317891	0.0228508713962263	0	0.0182920708617699	0.0218525182703385	0.909049003635913
S210	0.164319019483247	0.0804847262608261	0.052192638227371	0.0594954587678023	0.0592776501082625	0.577523112034619
S211	0.0854419654521634	0.167932278101768	0.119110922666964	0.0786718342283628	0.0739950135981994	0.474847985952542
S212	0.161266697894894	0.120754649694803	0.0196483222796507	0.0834042610313567	0.0649382635979803	0.549987805501316
S213	0.170801835100877	0.0987856342415146	0.0225805476884653	0.0766169840994237	0.0705161430803035	0.560698855789416
S214	0.112244304160427	0.176134404274168	0.0403251752580868	0.0698730773207095	0.0727611779791277	0.528661861007482
S215	0.15614639204295	0.0106554520043419	0.010092798961925	0.0430405705014869	0.0639371317254773	0.716127654763818
S216	0.141843338104477	0.195490838321866	-5.90154484137324e-19	0.0822371118864308	0.0568526082098146	0.523576103477411
S217	0.0959827310924333	0.223757213499566	0.0230406042890248	0.0747992820229977	0.0419418370692385	0.540478332026739
S218	0.211969079962487	-3.95771052469831e-19	0.101379409805335	0.0837378827559899	0.129235529927949	0.473678097548238
S219	0.185335406912391	0.0888691112182552	0.0536207535567162	0.0701397738363187	0.0841814506267787	0.507170453213819
S220	0.0691556843108134	0.0836851343515918	0.110674734691619	0.102940926911421	0.12761559552774	0.505927924206814
S221	0.103540578488276	0.0391628684785533	0	0.0556646779999142	0.0905693787936928	0.705662554005788
S222	0.115187419661612	0.13813743960866	0.00915269030161421	0.0760561089918755	0.0716676159962	0.573530767049084
S223	0.160191979464561	0.0735363809200068	0.0655159756519532	0.0670890382925987	0.0568022962541755	0.567705590839468
S224	0.0553125214901825	0.112643100457801	0.0305211697987354	0.0529593953668745	0.0880213096786041	0.659065809745899
S225	0.102069522479481	0.0771158333191242	0	0.0394901635681648	0.0847139680786504	0.685222962155008
S226	0.127724716852445	0.0867383980661286	0.0398762206729169	0.0727486689871911	0.0742440937541322	0.598667901667187
S227	0.0789916132274258	0.194933588767801	0.00544061758469812	0.0334592044479493	0.0826718032210159	0.589598047109606
S228	0.0486016281289902	0.110979104755677	1.73472347597681e-18	0.0197778716233628	0.0852859258644429	0.714534047118777
S229	0.0463967685894621	0.00987786281278629	0.00157148068369679	0.0392121544899851	0.100530725266809	0.789783981976067
S230	0.0620720782610978	0.0448979848285889	0.00761865456765337	0.0315352113239424	0.0931851483706882	0.749181305729194
S231	0.0971563181763533	0.152601616997335	0	0.0914262337080625	0.0827034187545348	0.565434119955584
S232	0.0770989290472815	0.00458201096031253	0.0162165508096489	0.0256533295084392	0.083539918522554	0.783190577980702
S233	0.0386298680367607	0.0710756951407245	0.0640429505904519	0.0289710944272465	0.107730137757289	0.689550254047528
S234	0.0322247414067452	0.0354243259869509	-3.46944695195361e-18	0.0271507323659785	0.0815466324248337	0.808217985458657
S235	0.115034979675107	0.0209584197685383	0.0491982410985731	0.0122860750368373	0.085803261044773	0.713653639538082
S236	0.0970081569142779	0	0.085847123162268	0.0397803989249666	0.0915039333005252	0.678484338480281
S237	0.0916289108585467	0.136661133929168	0.0689741534881025	0.045625527953432	0.0608967427482262	0.586102745914495
S238	0.0631595172456679	0.033983451914589	0	0.0366463582255239	0.0883334855963988	0.767295970378284
S239	0.0426341464193819	0.102304945897155	0.00853109070873752	0.0357470043856543	0.0973071350399277	0.70146534966741
S240	0.0459007479861264	0.00650381164360012	0	0.0147582140670366	0.1887410127928	0.729413690107178
S241	0.111323628716517	0.0837135163731567	0.00611432677423972	0.0283743550621186	0.0676348172011499	0.699567918056773
S242	0.114822413415778	0.0839035443992857	0.0467534479917894	0.0333375126726766	0.0738130451702496	0.634399273689654
S243	0.022572910078165	0	0.00288974245784974	0.0430574768737176	0.0379496394191454	0.886984789565885
S244	0.0890084596390142	0	0.00761811257514805	0.0206904851715637	0.0191776393910942	0.845914474006465
S245	0.050704346367737	0.0489675452465954	0.0335487320552551	0.0162942243790856	0.118977298954444	0.718893937547961
S246	0.0316155394134954	0.00700909839467559	0	0.0511464946700094	0.0903543328518771	0.800530872646545
S247	0.0912462110367709	0.109889227468343	0	0.14967310875084	0.0828380461027629	0.566353406641283
S248	0.113071881599732	0.103252094243863	0	0.04393692512943	0.104797070764215	0.628543394944582
S249	0.0732686741689086	0.0540036310528512	0	0.0210173639191793	0.0713124567000015	0.771258117214863
S250	0.0843277402988218	0	0.0462724719336725	0.0255977086032788	0.0658536402237946	0.769932072278307
S251	0.103137184049952	0	0.0508755417922718	0.0279899588192127	0.0989891440766798	0.709883866838243
S252	0.0983891332146696	0.00187660853123363	0.000716114623977215	0.0974591630130502	0.0555667037961089	0.739744267621371
S253	0.0376385068161507	0.0102534485626918	0.0297086335454666	0.0400295424415398	0.030860683893042	0.851509184741109
S254	0.113620098064412	0	0.0358985041165851	0.0354890933213723	0.0576261404305084	0.755073639254737
S255	0.086107390260125	0.0321846930466857	0.00540124420757754	0.0340777517786046	0.113221651753746	0.726449585604225
